# Supplementary material for: Unveiling chemical responses in the kombucha-based fermentation of black tea, banana flower, and grape juice: LC-ESIMS, GNPS, MS-DIAL, and MS-FINDER-assisted chemical characterization
Source: Royal Society of Chemistry journal article supplement (doi:10.1039/d3fo04977a), 2024-01-01

## Supplementary material

**Figure S1:** Chromatograms obtained in positive mode by UPLC-ESI-MS/MS for black tea infusion (*Camellia sinensis*) and fermented extracts in 7, 14 and 21 days.

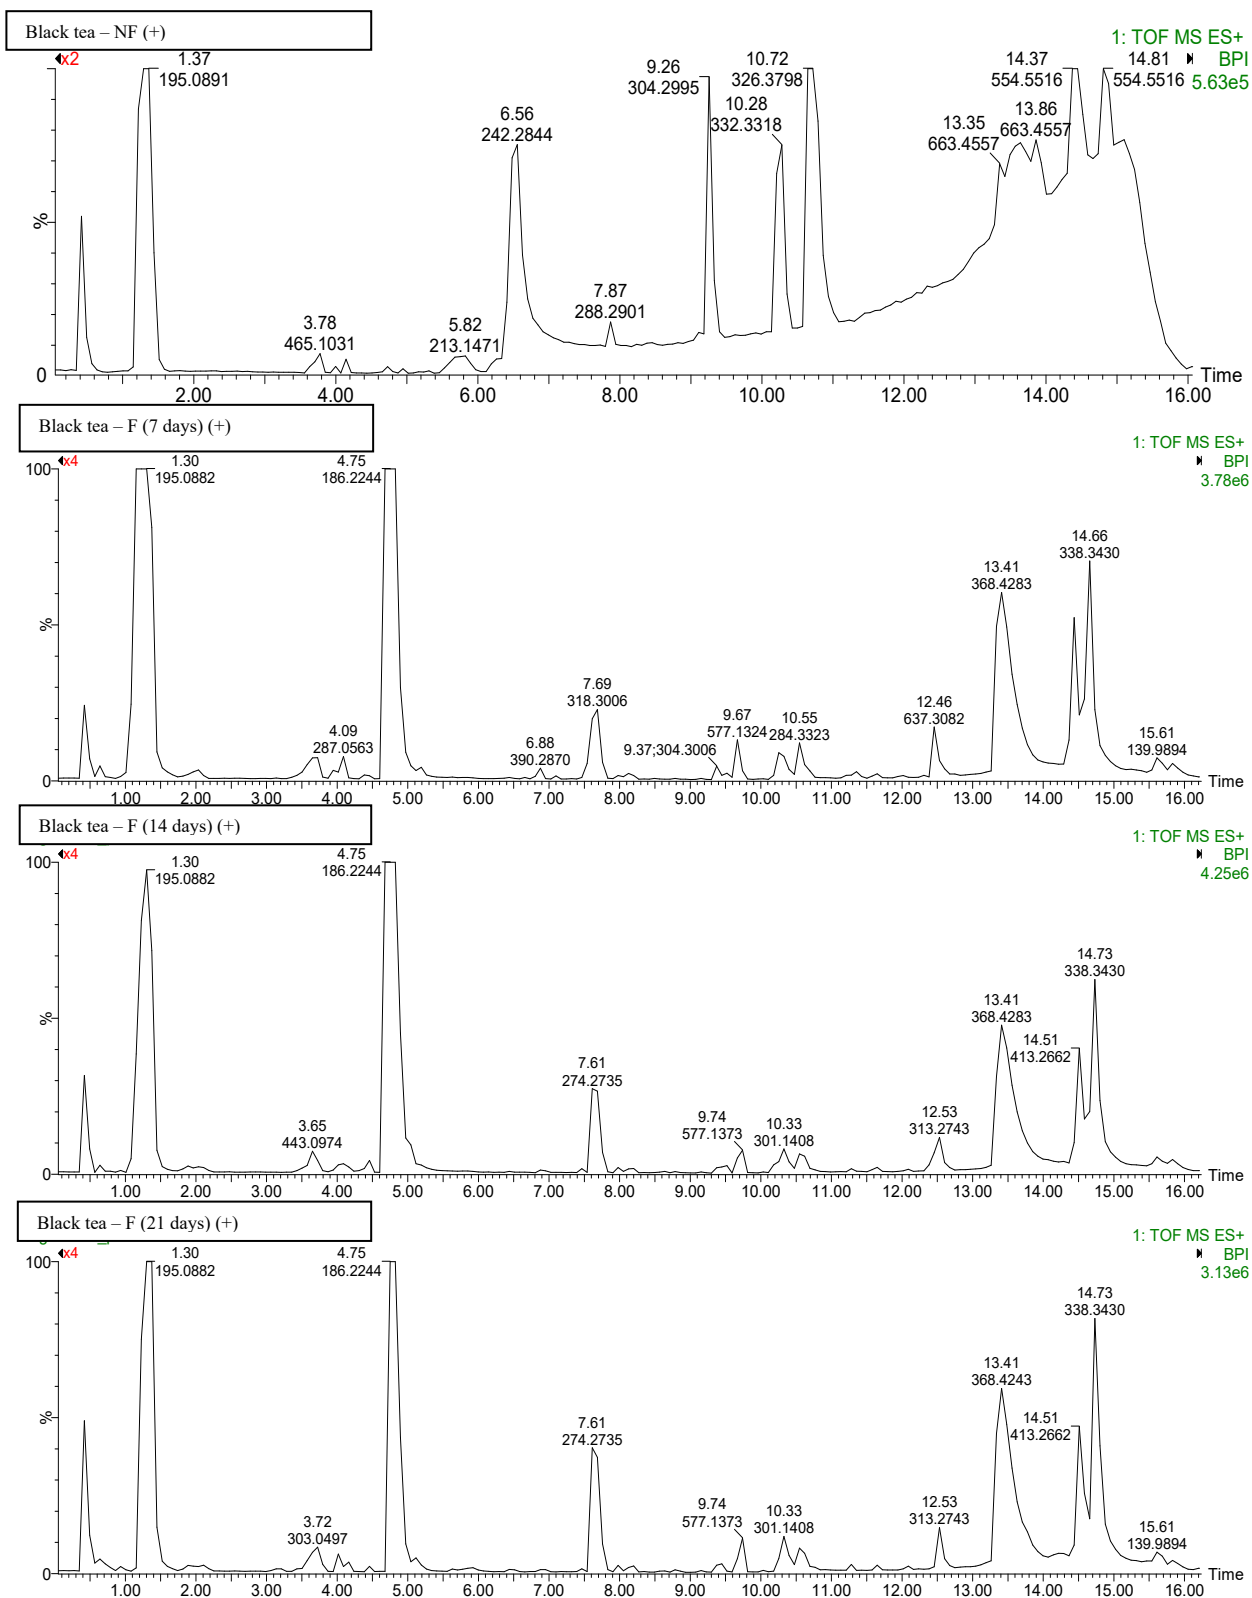

**Figure S2:** Chromatograms obtained in negative mode by UPLC-ESI-MS/MS for black tea infusion (*Camellia sinensis*) and fermented extracts in 7, 14 and 21 days

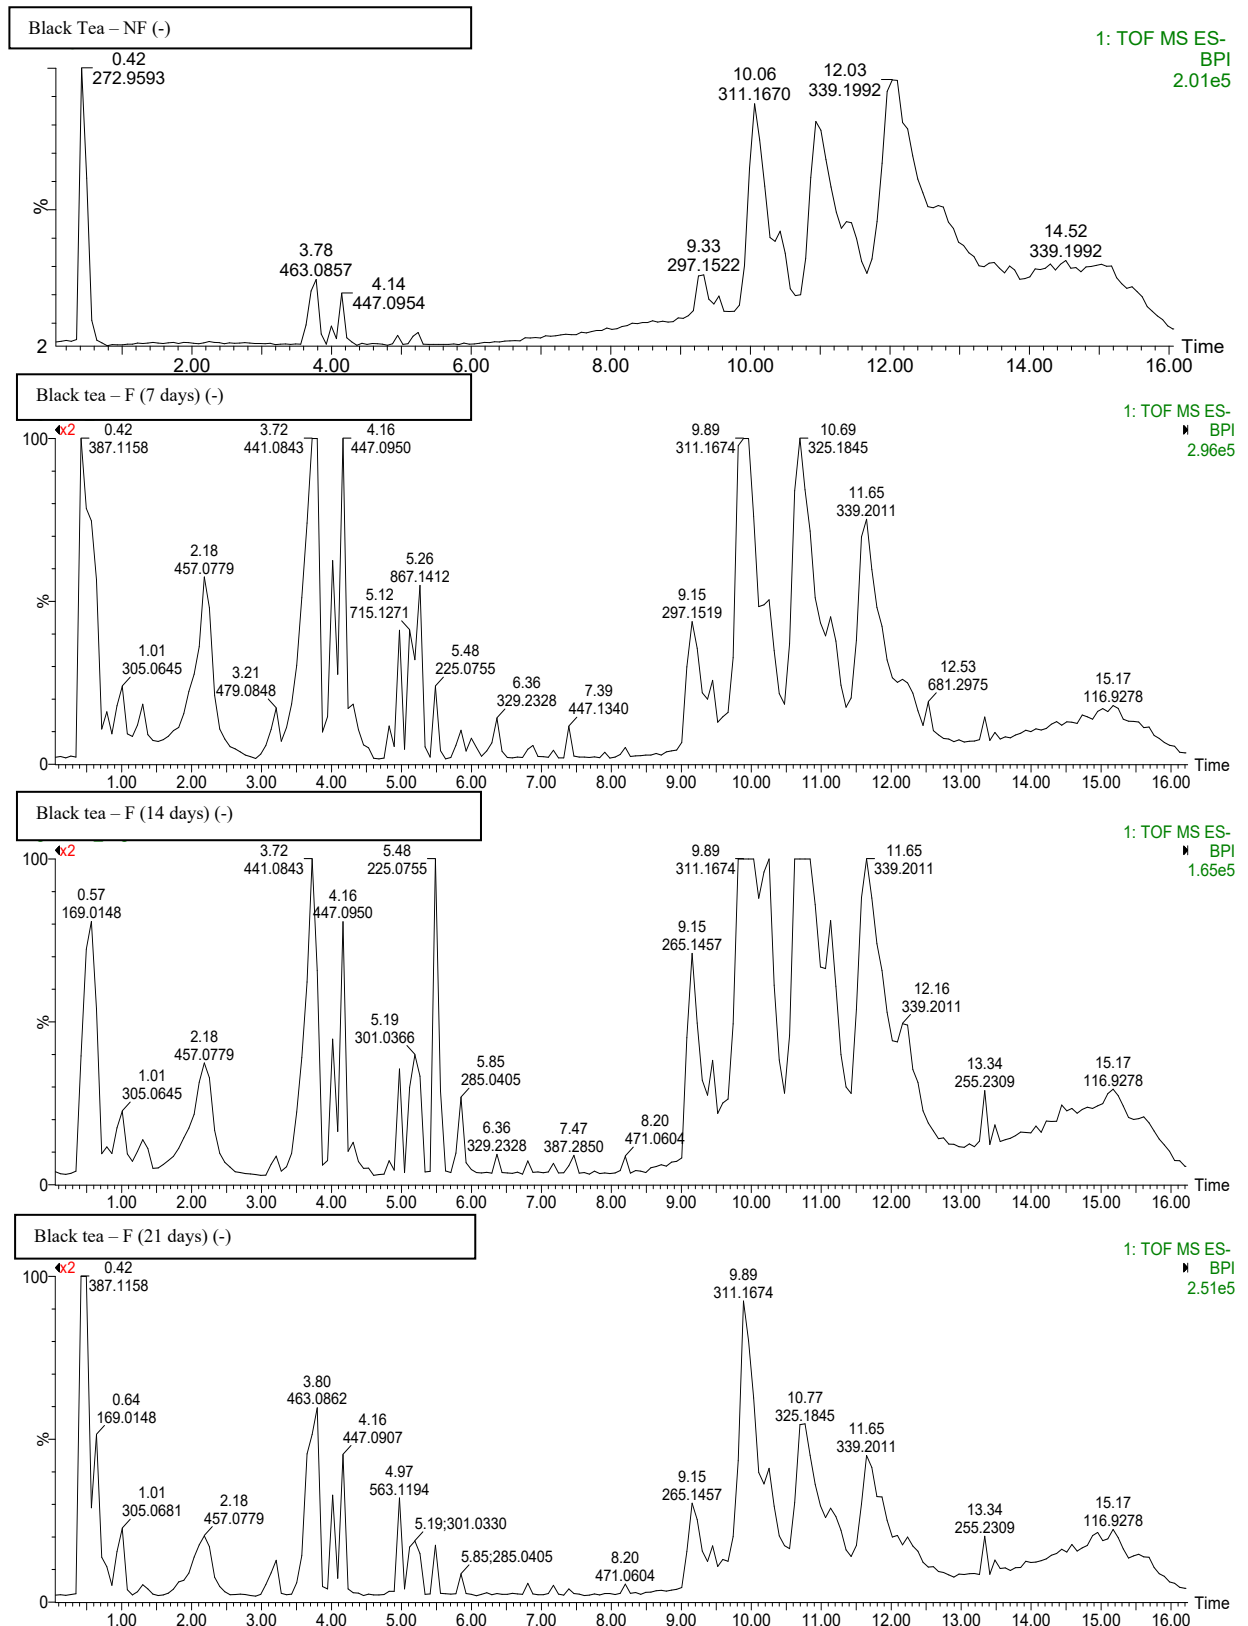

**Figure S3:** Chromatograms obtained in positive mode by UPLC-ESI-MS/MS of banana inflorescence (*M. acuminata*) infusion extract and fermented extracts in 7, 14 and 21

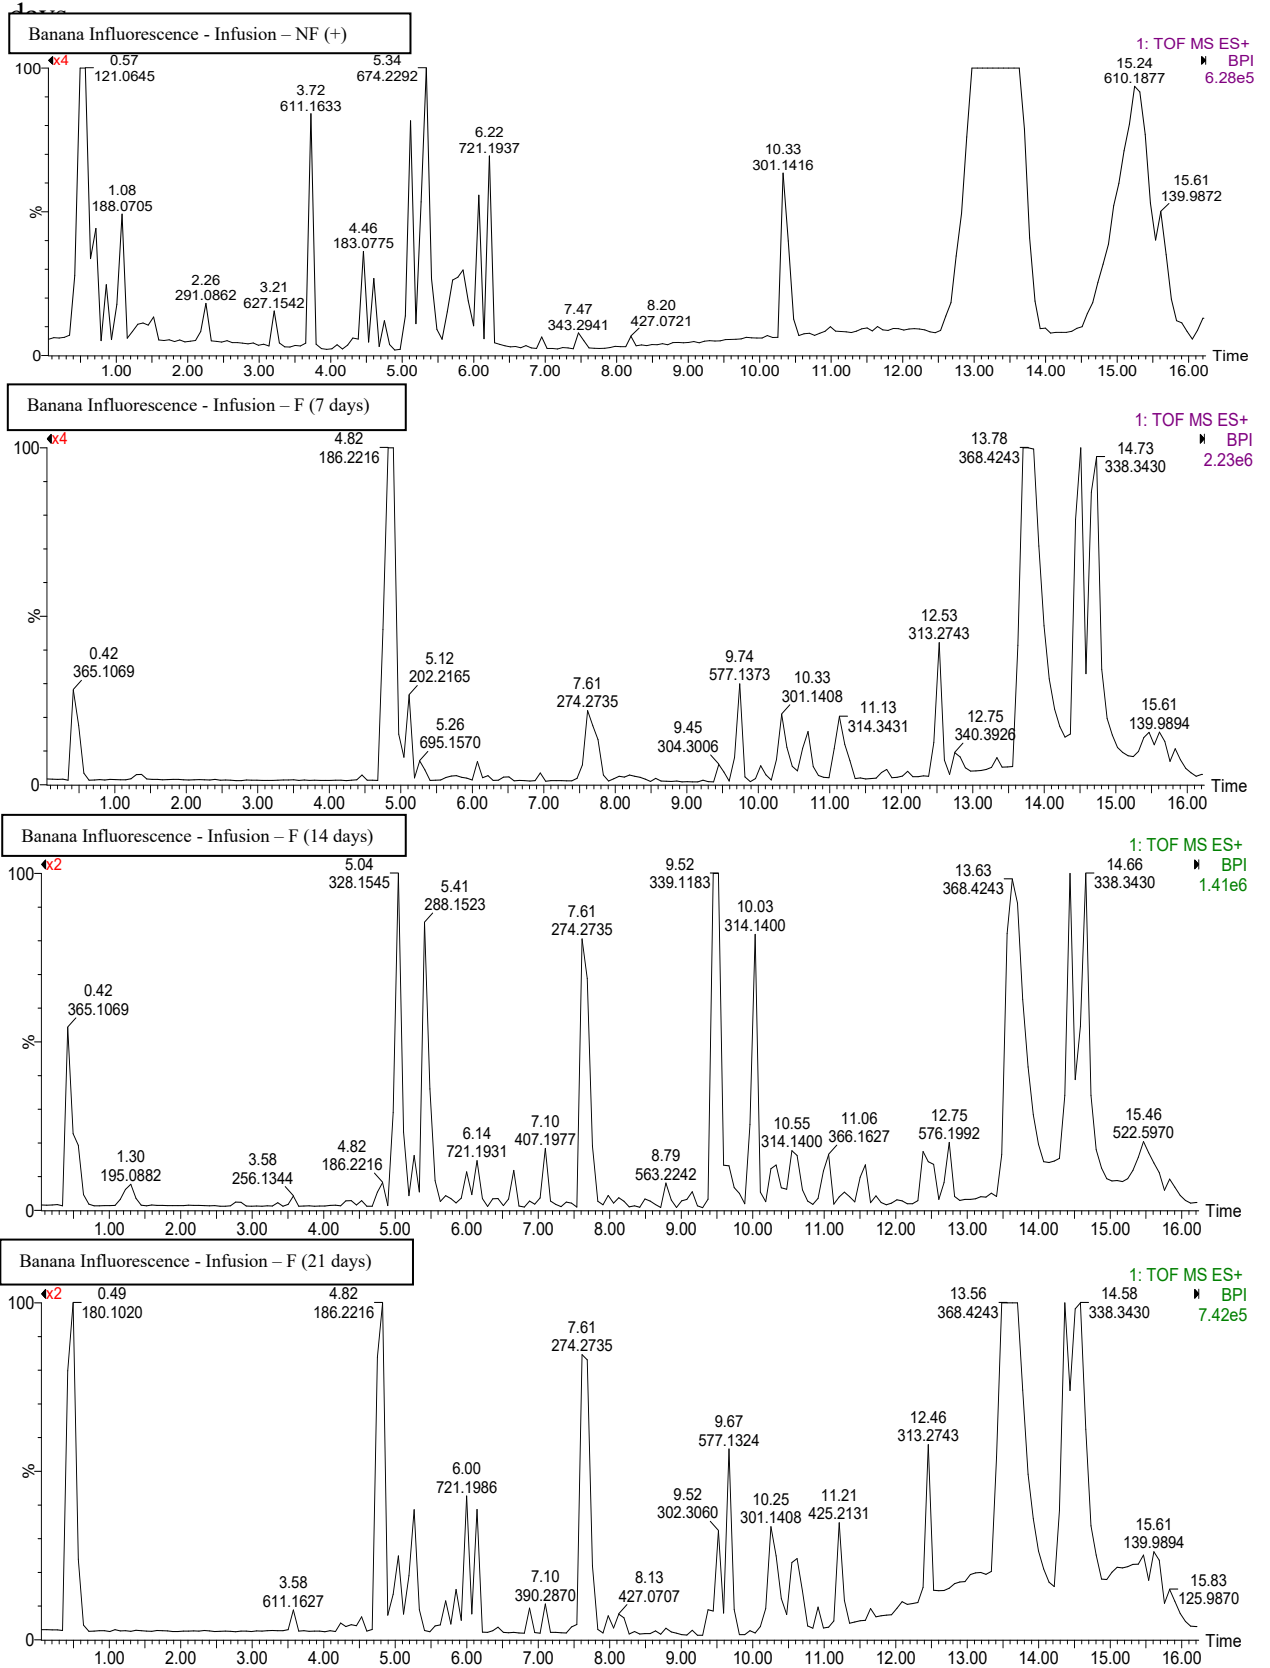

**Figure S4:** Chromatograms obtained in negative mode by UPLC-ESI-MS/MS of banana inflorescence (*M. acuminata*) infusion extract and fermented extracts in 7, 14 and 21

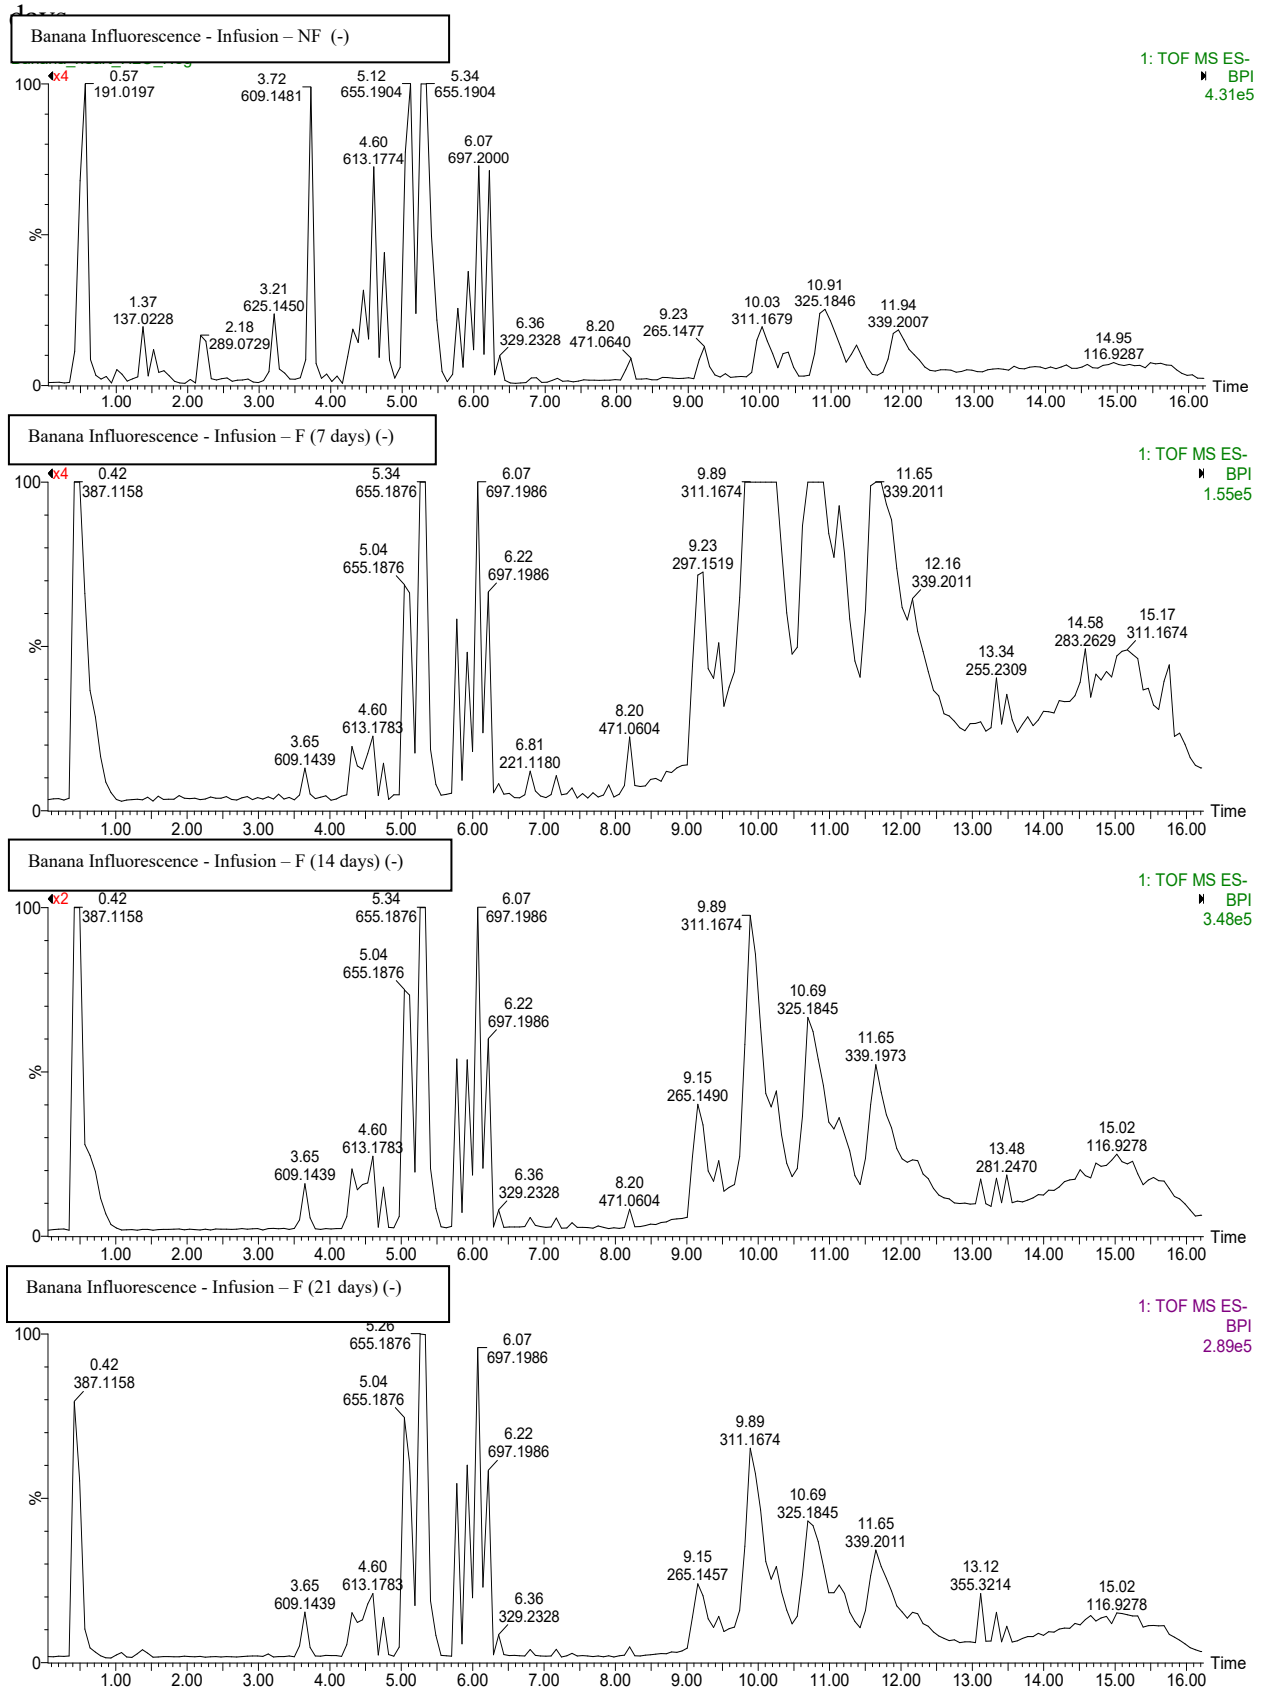

**Figure S5:** Chromatograms obtained in positive mode by UPLC-ESI-MS/MS of banana inflorescence (*M. acuminata*) hydroalcoholic extracts and fermented extracts in 7, 14 and 21 days.

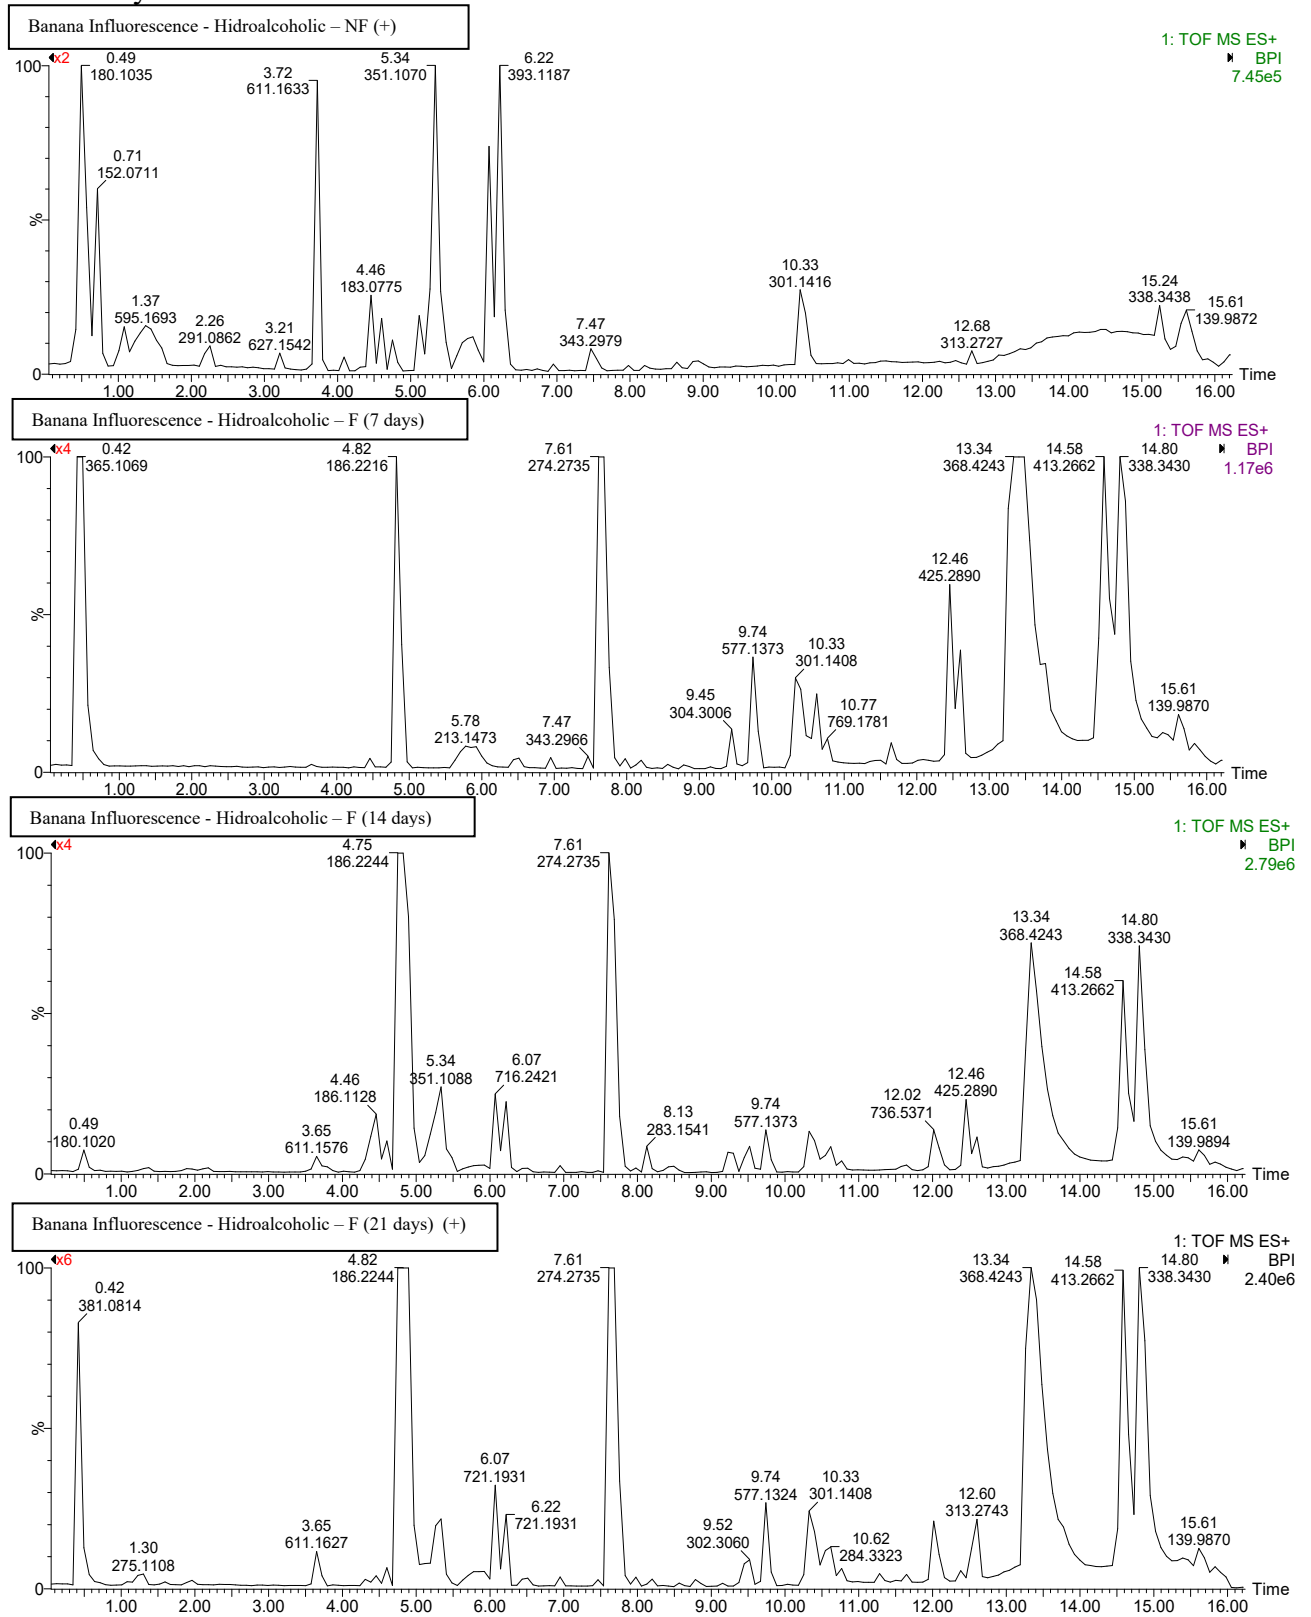

**Figure S6:** Chromatograms obtained in negative mode by UPLC-ESI-MS/MS of banana fluorescence (*M. acuminata*) hydroalcoholic extracts and fermented extracts in 7, 14 and 21 days.

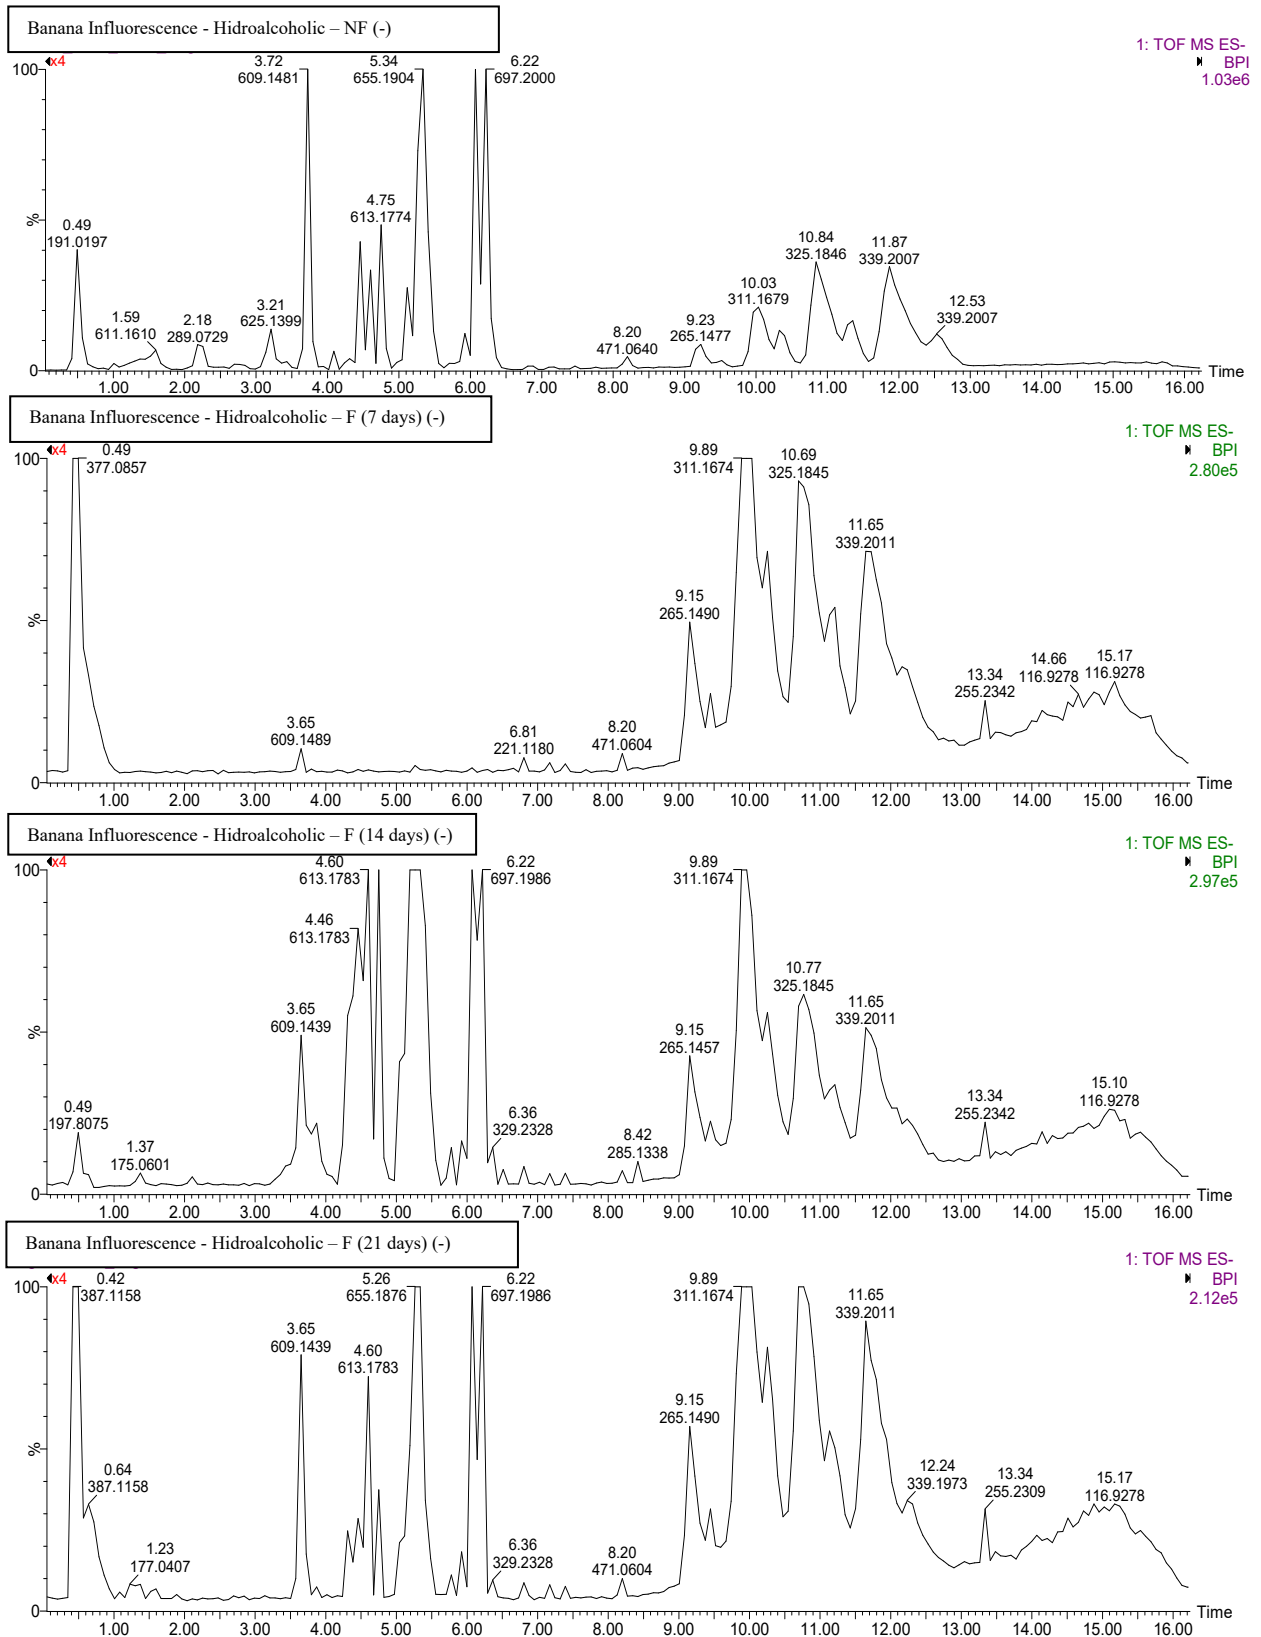

**Figure S7:** Chromatograms obtained in positive mode by UPLC-ESI-MS/MS for n-butanol extract of grape juice (*V. labrusca*) non-fermented and fermented extracts in 7,

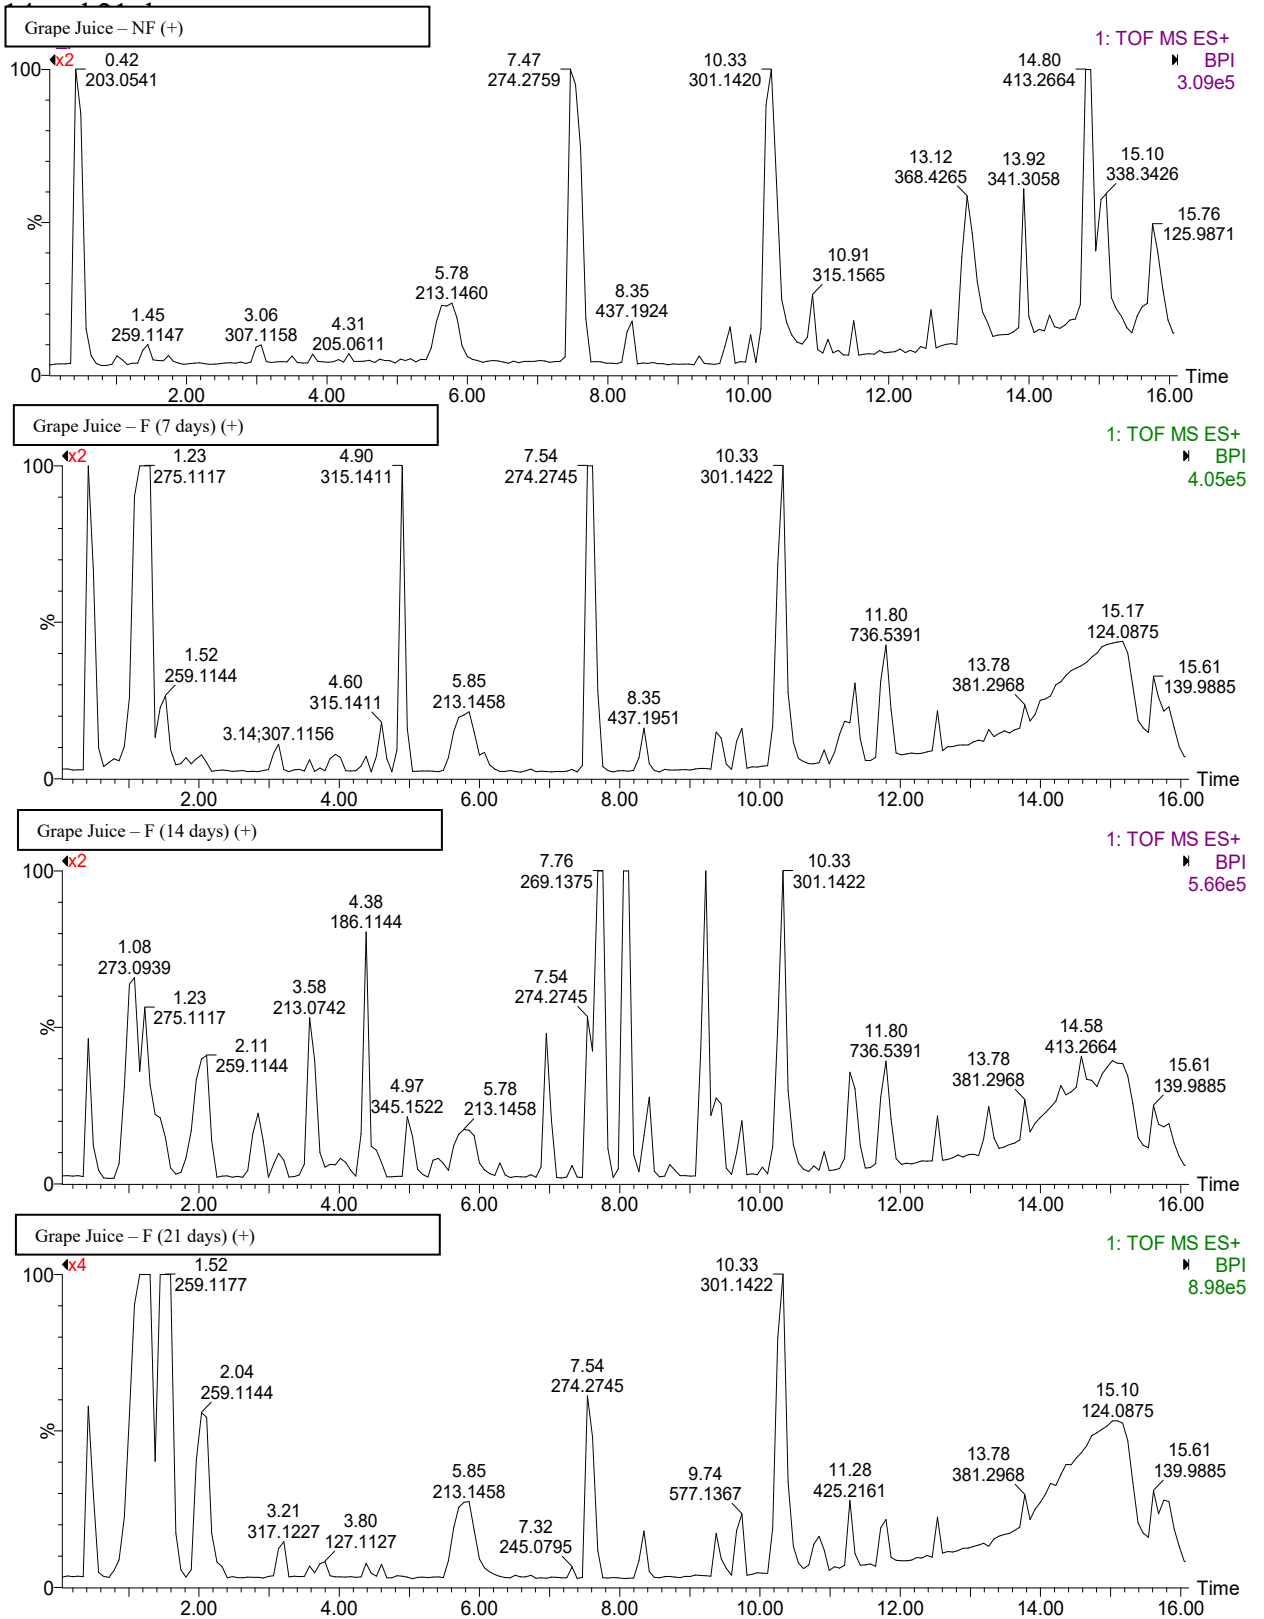

**Figure S8:** Chromatograms obtained in negative mode by UPLC-ESI-MS/MS for n-butanol extract of grape juice (*V. labrusca*) non-fermented and fermented extracts in 7,

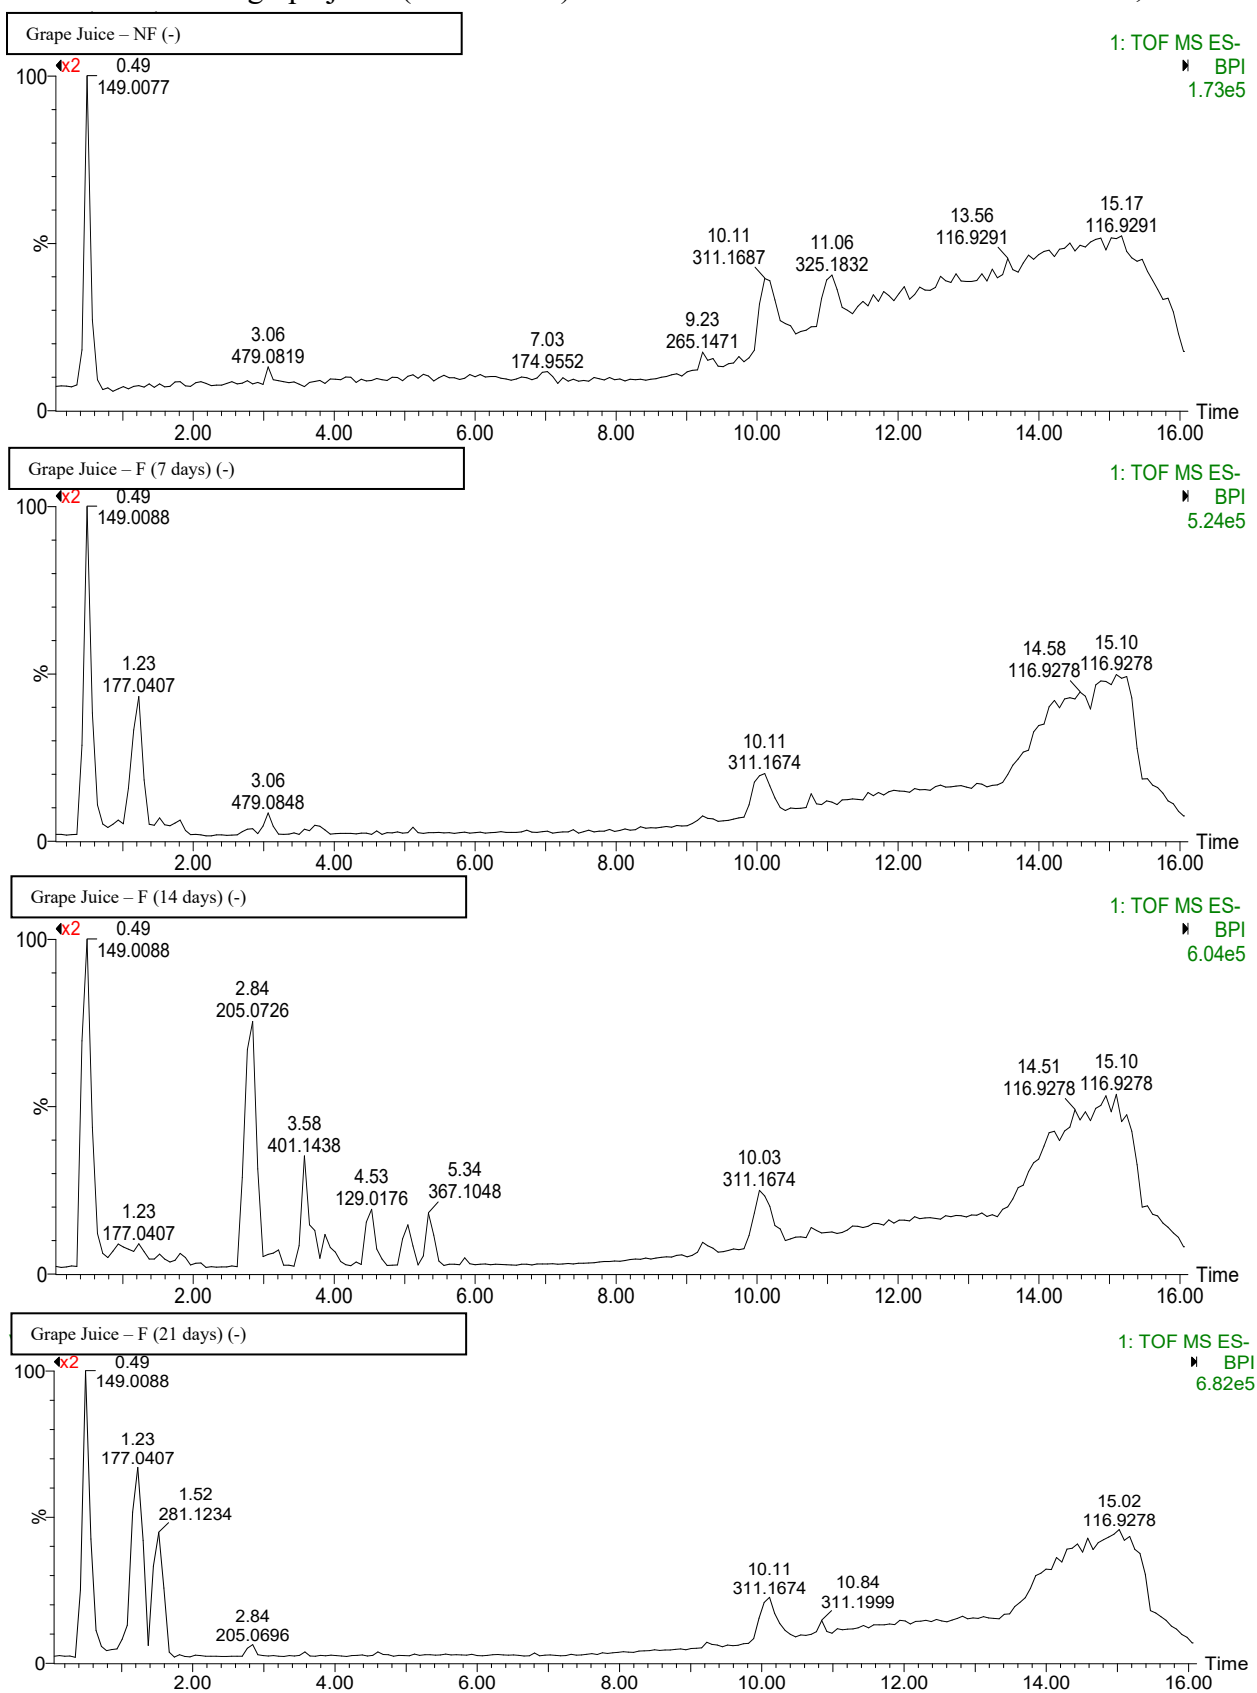



**Figure S9:** Tandem mass spectrum of compound 3: Gallocatechin-(4 $\alpha$ ->8)-epigallocatechin detected in black tea

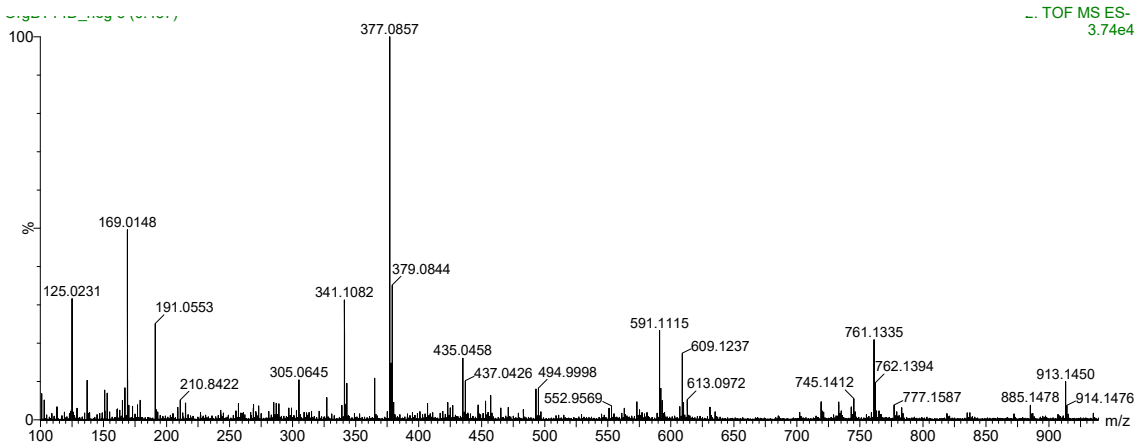

**Figure S10:** Tandem mass spectrum of compound 19: (-)-Catechin 3-O-gallate detected in black tea

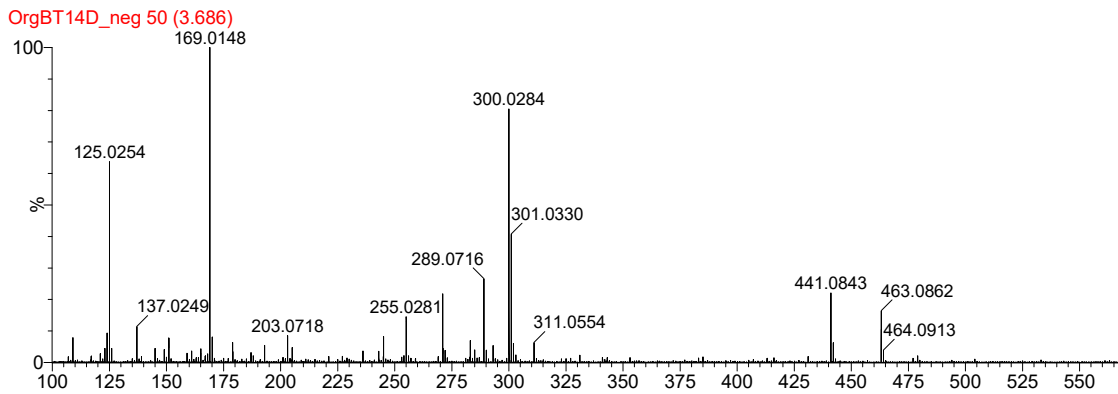

**Figure S11:** Tandem mass spectrum of compound 32: Theaflavin-3-gallate detected in black tea

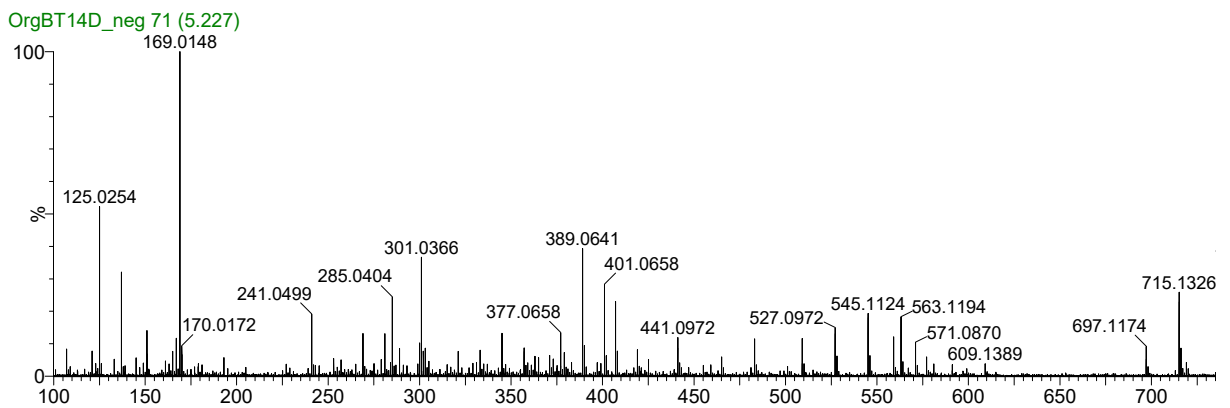

**Figure S12:** Tandem mass spectrum of m/z 302.3050 (compound **37**) detected in Black tea

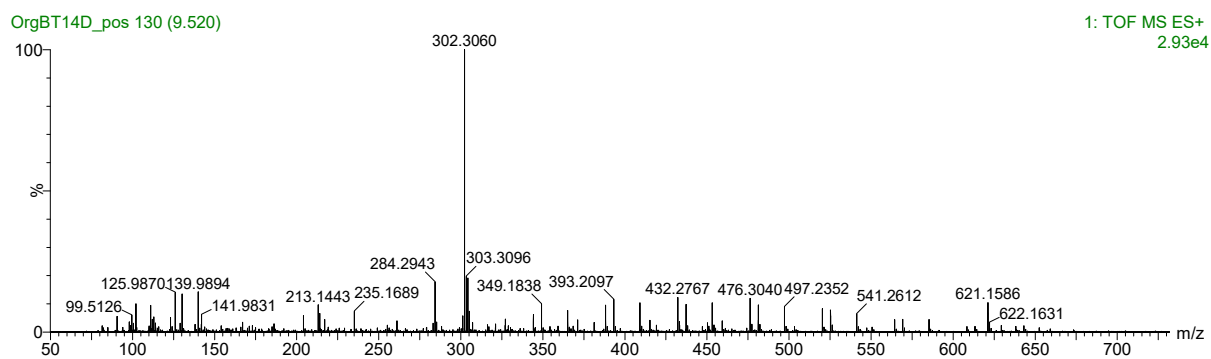

**Figure S13:** Tandem mass spectrum of compound **54** detected in grape juice

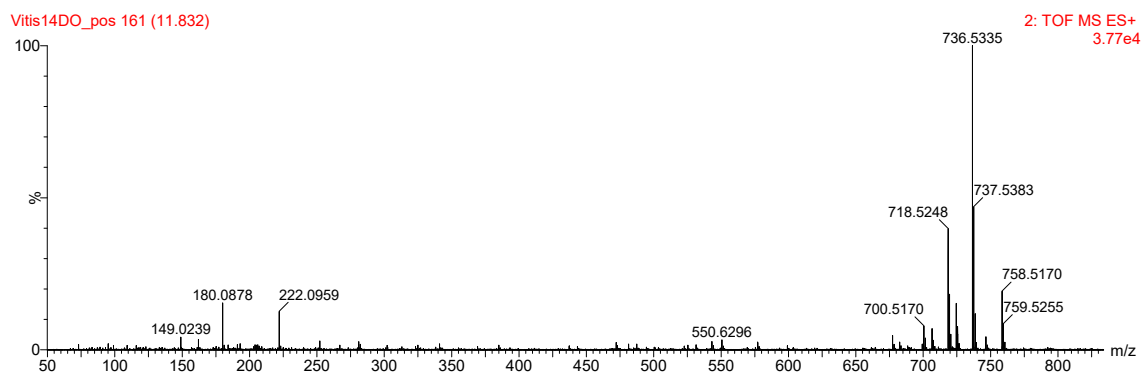

**Table S1** Calibration curves obtained for positive control, non-fermented and fermented extracts antioxidant activity by DPPH neutralization assay

| Samples                  | Ferm.Time<br>(days) | Equation               | R <sup>2</sup> | Range<br>( $\mu\text{g mL}^{-1}$ ) | EC <sub>50</sub><br>( $\mu\text{g mL}^{-1}$ ) |
|--------------------------|---------------------|------------------------|----------------|------------------------------------|-----------------------------------------------|
| Ácido gálico             | 0                   | $y = 13,49x + 43,729$  | 0,9359         | 0,05-4                             | 0.46                                          |
| Trolox                   | 0                   | $y = 19,425x - 1,8908$ | 0,9926         | 0,1-5                              | $2.67 \pm 0.10$                               |
| Black Tea                | 0                   | $y = 3,4178x$          | 0,9913         | 5-30                               | $14.63 \pm 0.10$                              |
|                          | 7                   | $y = 4,5173x$          | 0,9908         | 0,5-20                             | $11.07 \pm 0.10$                              |
|                          | 14                  | $y = 4,1851x$          | 0,9799         | 0,5-20                             | $11.95 \pm 0.10$                              |
|                          | 21                  | $y = 9,4503x$          | 0,971          | 0,5-10                             | $5.29 \pm 0.10$                               |
| Grape Juice              | 0                   | $y = 0,5791x$          | 0,9199         | 20-200                             | $86.34 \pm 0.37$                              |
|                          | 7                   | $y = 0,5541x$          | 0,9353         | 20-200                             | $90.24 \pm 0.40$                              |
|                          | 14                  | $y = 0,5365x$          | 0,952          | 20-200                             | $93.20 \pm 0.23$                              |
|                          | 21                  | $y = 0,2974x$          | 0,985          | 20-200                             | $168.12 \pm 1.22$                             |
| Banana<br>Hidroalcoholic | 0                   | $y = 0,5136x$          | 0,9745         | 20-200                             | $97.35 \pm 0.06$                              |
|                          | 7                   | $y = 0,3381x$          | 0,9734         | 20-200                             | $147.89 \pm 0.05$                             |
|                          | 14                  | $y = 0,4778x$          | 0,9595         | 20-200                             | $104.65 \pm 0.06$                             |
|                          | 21                  | $y = 0,4981x$          | 0,9659         | 20-200                             | $100.38 \pm 0.07$                             |
| Banana Infusion          | 7                   | $y = 0,5169x$          | 0,9826         | 20-200                             | $96.73 \pm 0.05$                              |
|                          | 14                  | $y = 0,5657x$          | 0,9424         | 20-200                             | $88.39 \pm 0.08$                              |
|                          | 21                  | $y = 0,6191x$          | 0,8787         | 20-200                             | $80.76 \pm 0.10$                              |

**Figure S14:** DPPH neutralization % at  $60 \mu\text{g mL}^{-1}$  for non-fermented (0) and fermented (7, 14, 21 days) extracts.

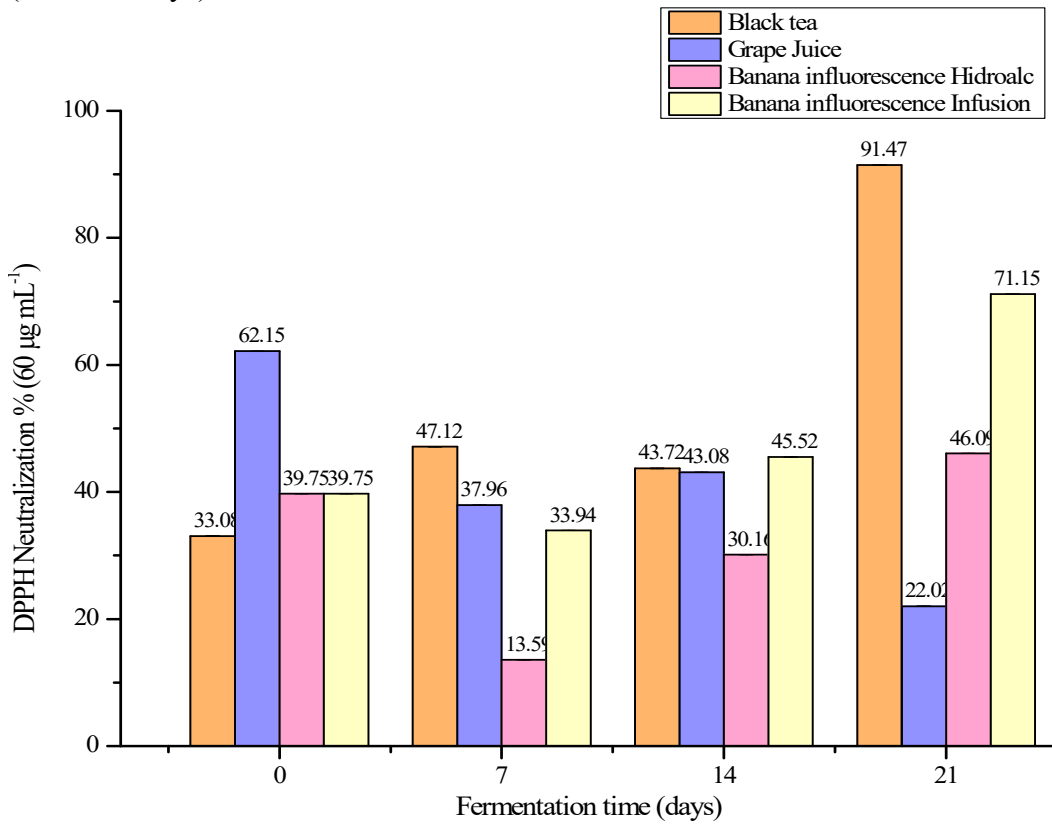

**Figure S15** Antioxidant activity for non-fermented (0) and fermented (7, 14, 21 days) extracts obtained through calibration curves of DPPH neutralization

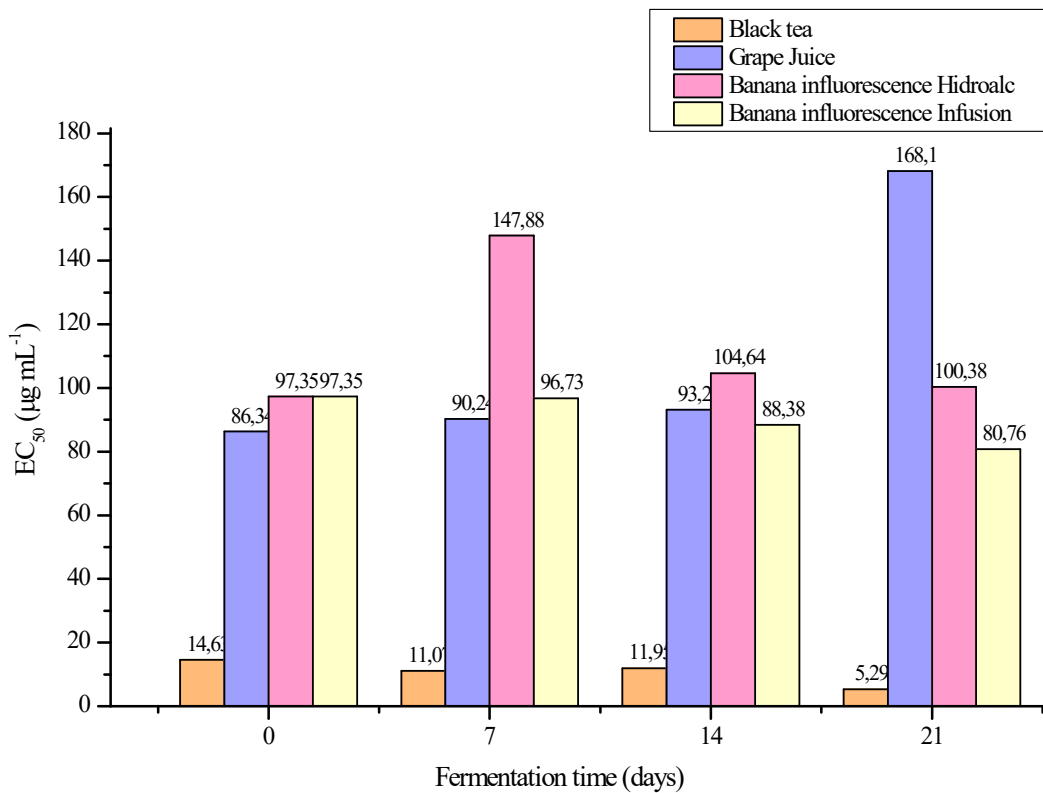

**Figure S16** Alpha-glucosidase inhibition percentage at 1400  $\mu\text{g mL}^{-1}$  for non-fermented (0), fermented (7, 14 and 21 days) for anti-hyperglycemic activity.

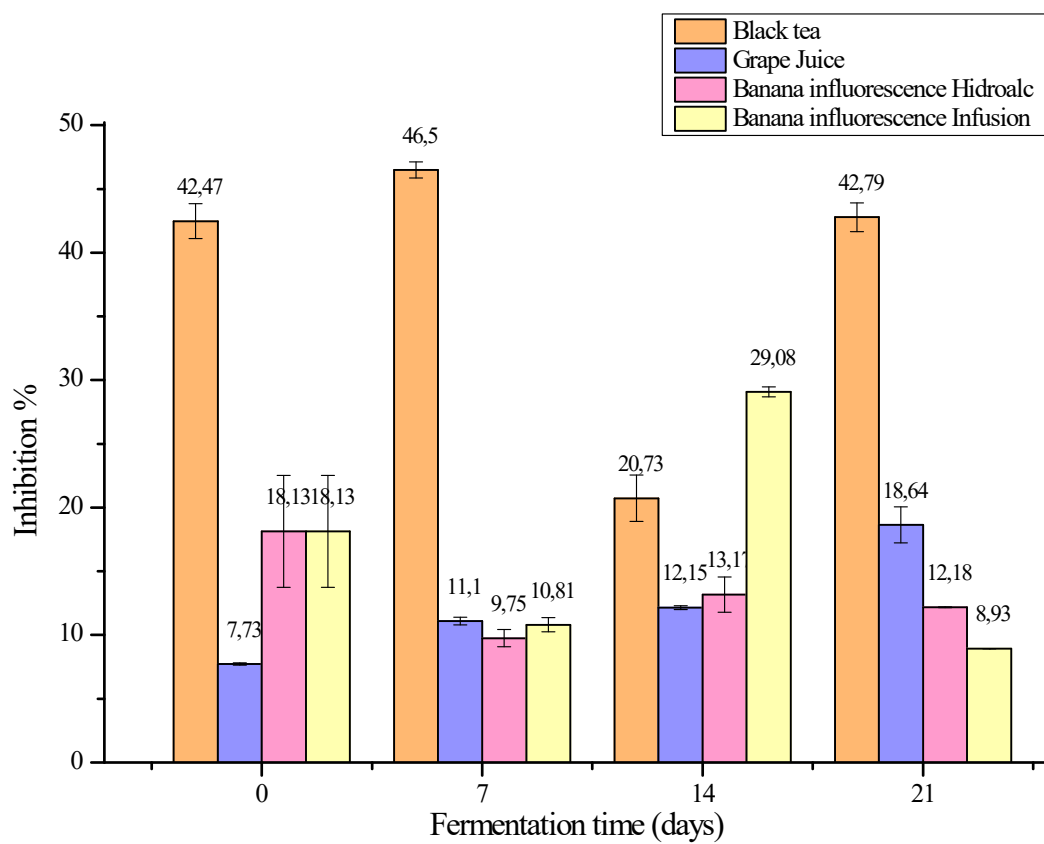

Supplement: d3fo04977a1.pdf [file d3fo04977a1.pdf]
